# Supplementary material
Source: publisher figshare collection journal article supplement (https://rs.figshare.com/ndownloader/files/25628654)
Supplement: Supplementary file 1 [file 25628654]

| Molecule                              | #    |
|---------------------------------------|------|
| Osteoblast cell                       | 1    |
| $I_d$                                 | 500  |
| $I_{f\ act}$                          | 0    |
| $I_{f\ act} + FAK_{act}$              | 0    |
| $I_{act}$                             | 0    |
| $FAK_{act}$                           | 1000 |
| $I_{f\ act} + FAK_{act}$              | 1    |
| $I_{f\ act} + FAK_{act} + RAS_d$      | 1    |
| $FAK_d$                               | 1    |
| $RAS_d$                               | 1000 |
| $I_{f\ act} + FAK_{act} + RAS_d$      | 0    |
| $RAS_{act}$                           | 0    |
| $RAS_{act} + RAF_d$                   | 0    |
| $RAF_d$                               | 32   |
| $RAS_{act} + RAF_d$                   | 0    |
| $RAF_{act}$                           | 0    |
| $RAF_{act} + MEK_d$                   | 0    |
| $MEK_d$                               | 3400 |
| $RAF_{act} + MEK_d$                   | 0    |
| $MEK_{act}$                           | 0    |
| $MEK_{act} + ERK_d$                   | 0    |
| $ERK_d$                               | 2300 |
| $MEK_{act} + ERK_d$                   | 0    |
| $ERK_{act}$                           | 0    |
| $ERK_{act} + RUNX2_d$                 | 0    |
| $ERK_{act} + OTHER$                   | 0    |
| $RUNX2_d$                             | 24   |
| $ERK_{act} + RUNX2_d$                 | 0    |
| $RUNX2_{act}$                         | 0    |
| $RUNX2_{act} + DNA$                   | 0    |
| $OSX_{mon}$                           | 8    |
| $RUNX2_{act} + OSX_{mon}$             | 0    |
| $OSX_{mon} + DNA$                     | 5    |
| $RUNX2_{act} + OSX_{mon} + DNA$       | 0    |
| $RUNX2_{act} + OSX_{mon} + DNA + AP1$ | 0    |
| $OSX_{mul}$                           | 5    |
| $RUNX2_{act} + OSX_{mul}$             | 0    |
| $OSX_{mul} + DNA$                     | 6    |
| $RUNX2_{act} + OSX_{mul} + DNA$       | 0    |
| $AP1$                                 | 0    |
| $RUNX2_{act} + OSX_{mon} + DNA + AP1$ | 0    |
| $OPN_{RNA}$                           | 0    |
| $Rib_{av} + OPN_{RNA}$                | 0    |
| $Rib_{n\ av} + OPN_{RNA}$             | 0    |
| $OCN_{RNA}$                           | 0    |
| $Rib_{av} + OCN_{RNA}$                | 0    |
| $Rib_{n\ av} + OCN_{RNA}$             | 0    |
| $ALP_{RNA}$                           | 0    |
| $Rib_{av} + ALP_{RNA}$                | 0    |
| $Rib_{n\ av} + ALP_{RNA}$             | 0    |
| $BSP_{RNA}$                           | 0    |
| $Rib_{av} + BSP_{RNA}$                | 0    |
| $Rib_{n\ av} + BSP_{RNA}$             | 0    |
| $Rib_{n\ comp}$                       | 299  |
| $Rib_{n\ comp} + RNA$                 | 0    |
| $Rib_c$                               | 301  |
| $Rib_c + RNA$                         | 0    |
| $MAT + Vesc$                          | 0    |

2 **Supplementary table 1: Number of molecules at  $t_0$**

3

| Parameter                                                                            | Symbol                                                                            | Value                          | Unit of measure |
|--------------------------------------------------------------------------------------|-----------------------------------------------------------------------------------|--------------------------------|-----------------|
| Mechanical min. magnitude                                                            | $m$                                                                               | 100                            | $\mu Pa$        |
| Mechanical phase                                                                     | $\phi$                                                                            | 0                              | rad             |
| Integrin activation delay                                                            | $T_{I_d \rightarrow I_f \text{ act}}$                                             | 0                              | s               |
| $I_d$ dissoc. time from I + FAK comp.                                                | $T_{I_f \text{ act} + FAK_{act} \rightarrow I_d}$                                 | $U[0, 80]$                     | s               |
| FAK <sub>act</sub> activation delay                                                  | $T_{FAK_d \rightarrow FAK_{act}}$                                                 | 5                              | s               |
| FAK <sub>d</sub> dissoc. time from I + FAK comp.                                     | $T_{I_f \text{ act} + FAK_{act} \rightarrow FAK_d}$                               | 30                             | s               |
| $I_{act}$ + FAK dissoc. time                                                         | $T_{I_f \text{ act} + FAK_{act} + RAS_d \rightarrow I_f \text{ act} + FAK_{act}}$ | 7                              | s               |
| RAS <sub>act</sub> dissoc. time from I + FAK + RAS comp.                             | $T_{I_f \text{ act} + FAK_{act} + RAS_d \rightarrow RAS_{act}}$                   | 7                              | s               |
| RAS <sub>act</sub> dissoc. form RAS + RAF comp.                                      | $T_{RAS_{act} + RAF_d \rightarrow RAS_{act}}$                                     | 14                             | s               |
| RAS <sub>act</sub> relaxation time                                                   | $T_{RAS_{act} \rightarrow RAS_d}$                                                 | 60                             | s               |
| RAF <sub>act</sub> dissoc. time                                                      | $T_{RAS_{act} + RAF_d \rightarrow RAF_{act}}$                                     | 14                             | s               |
| RAF <sub>act</sub> dissoc. time from RAF + MEK                                       | $T_{RAF_{act} + MEK_d \rightarrow RAF_{act}}$                                     | 10                             | s               |
| Relaxation of RAF <sub>act</sub>                                                     | $T_{RAF_{act} \rightarrow RAF_d}$                                                 | 60                             | s               |
| MEK <sub>act</sub> dissoc. time from RAF + MEK comp.                                 | $T_{RAF_{act} + MEK_d \rightarrow MEK_{act}}$                                     | 10                             | s               |
| MEK <sub>act</sub> dissoc. time from MEK + ERK comp.                                 | $T_{MEK_{act} + ERK_d \rightarrow MEK_{act}}$                                     | 8                              | s               |
| MEK relaxation time                                                                  | $T_{MEK_{act} \rightarrow MEK_d}$                                                 | 88                             | s               |
| ERK activation time                                                                  | $T_{MEK_{act} + ERK_d \rightarrow ERK_{act}}$                                     | 8                              | s               |
| ERK relaxation time                                                                  | $T_{ERK_{act} \rightarrow ERK_d}$                                                 | 50                             | s               |
| ERK <sub>d</sub> dissoc. time from RUNX2 + ERK comp.                                 | $T_{ERK_{act} + RUNX2_d \rightarrow ERK_{act}}$                                   | 10                             | s               |
| ERK <sub>act</sub> dissoc. time from ERK <sub>act</sub> + OTHER comp.                | $T_{ERK_{act} + OTHER \rightarrow ERK_{act}}$                                     | 6                              | s               |
| RUNX2 <sub>act</sub> dissoc. time from ERK <sub>act</sub> + RUNX2 <sub>d</sub> comp. | $T_{ERK_{act} + RUNX2_d \rightarrow RUNX2_{act}}$                                 | 10                             | s               |
| RUNX2 <sub>act</sub> dissoc. time from RUNX2 <sub>act</sub> + DNA comp.              | $T_{RUNX2_{act} + DNA \rightarrow RUNX2_{act}}$                                   | 10                             | s               |
| RUNX2 relaxation time                                                                | $T_{RUNX2_{act} \rightarrow RUNX2_d}$                                             | 60                             | s               |
| OSX <sub>mon</sub> dissoc. time from RUNX2 <sub>act</sub> + OSX <sub>mon</sub> comp. | $T_{RUNX2_{act} + OSX_{mon} \rightarrow OSX_{mon}}$                               | 20                             | s               |
| OSX <sub>mon</sub> + DNA dissoc. time from RUNX2 <sub>act</sub>                      | $T_{RUNX2_{act} + OSX_{mon} + DNA \rightarrow OSX_{mon} + DNA}$                   | 30                             | s               |
| OSX <sub>mon</sub> + DNA dissoc. time from AP1                                       | $T_{RUNX2_{act} + OSX_{mon} + DNA + AP1 \rightarrow OSX_{mon} + DNA}$             | 0                              | s               |
| OSX <sub>mul</sub> dissoc. time from RUNX2 <sub>act</sub> + OSX <sub>mul</sub> comp. | $T_{RUNX2_{act} + OSX_{mul} \rightarrow OSX_{mul}}$                               | 40                             | s               |
| OSX <sub>mul</sub> + DNA dissoc. time from RUNX2 <sub>act</sub>                      | $T_{RUNX2_{act} + OSX_{mul} + DNA \rightarrow OSX_{mul} + DNA}$                   | 50                             | s               |
| ribosome availability time from Rib <sub>n av</sub> + OPN <sub>RNA</sub>             | $T_{Rib_{n av} + OPN_{RNA} \rightarrow Rib_{av} + OPN_{RNA}}$                     | 20                             | s               |
| OPN <sub>RNA</sub> dissociation time from available ribosome                         | $T_{Rib_{av} + OPN_{RNA} \rightarrow OPN_{RNA}}$                                  | 75                             | s               |
| ribosome availability time from Rib <sub>n av</sub> + OCN <sub>RNA</sub>             | $T_{Rib_{n av} + OCN_{RNA} \rightarrow Rib_{av} + OCN_{RNA}}$                     | 20                             | s               |
| OCN <sub>RNA</sub> dissociation time from available ribosome                         | $T_{Rib_{av} + OCN_{RNA} \rightarrow OCN_{RNA}}$                                  | 75                             | s               |
| ribosome availability time from Rib <sub>n av</sub> + ALP <sub>RNA</sub>             | $T_{Rib_{n av} + ALP_{RNA} \rightarrow Rib_{av} + ALP_{RNA}}$                     | 20                             | s               |
| ALP <sub>RNA</sub> dissociation time from available ribosome                         | $T_{Rib_{av} + ALP_{RNA} \rightarrow ALP_{RNA}}$                                  | 75                             | s               |
| ribosome availability time from Rib <sub>n av</sub> + BSP <sub>RNA</sub>             | $T_{Rib_{n av} + BSP_{RNA} \rightarrow Rib_{av} + BSP_{RNA}}$                     | 20                             | s               |
| BSP <sub>RNA</sub> dissociation time from available ribosome                         | $T_{Rib_{av} + BSP_{RNA} \rightarrow BSP_{RNA}}$                                  | 75                             | s               |
| RNA dissociation time from Rib <sub>n comp</sub>                                     | $T_{Rib_{n comp} + RNA \rightarrow Rib_{n comp}}$                                 | 100                            | s               |
| RNA dissociation time from complete ribosome                                         | $T_{Rib_c + RNA \rightarrow Rib_c}$                                               | 100                            | s               |
| force tag probability                                                                | $F_{tag}$                                                                         | $P_{\{01,02\}} = \{0.9, 0.1\}$ |                 |
| $I_d$ interaction radius                                                             | $R_{I_d}$                                                                         | 50                             | nm              |
| FAK <sub>act</sub> interaction radius                                                | $R_{FAK_{act}}$                                                                   | 50                             | nm              |
| RAS <sub>d</sub> interaction radius                                                  | $R_{RAS_d}$                                                                       | 80                             | nm              |
| RAF <sub>d</sub> interaction radius                                                  | $R_{RAF_d}$                                                                       | 70                             | nm              |
| MEK <sub>d</sub> interaction radius                                                  | $R_{MEK_d}$                                                                       | 50                             | nm              |
| ERK <sub>d</sub> interaction radius                                                  | $R_{ERK_d}$                                                                       | 30                             | nm              |
| RUNX2 <sub>d</sub> interaction radius                                                | $R_{RUNX2_d}$                                                                     | 30                             | nm              |
| OSX <sub>mon</sub> interaction radius                                                | $R_{OSX_{mon}}$                                                                   | 30                             | nm              |
| Rib <sub>n comp</sub> interaction radius                                             | $R_{Rib_{n comp}}$                                                                | 30                             | nm              |
| cell radius                                                                          | $R_{cell}$                                                                        | 1000                           | nm              |
| nucleus radius                                                                       | $R_{nucl}$                                                                        | 400                            | nm              |
| protein' s average velocity                                                          | $\bar{v}_p$                                                                       | 2                              | nm/s            |
| protein' s velocity variation                                                        | $\Delta v_p$                                                                      | 1                              | nm/s            |
| protein' s direction variation                                                       | $\Delta \varphi_p = \Delta \theta_p$                                              | $\pi/10$                       | rad             |
| protein translation delay                                                            | $T_p$                                                                             | 95                             | s               |
| transcription delay per mRNA                                                         | $T_{RNA}$                                                                         | 600                            | s               |
| Integrins $\theta$ angle on cell membrane distribution                               | $I_\theta$                                                                        | $U[0, \pi]$                    | 1/rad           |
| Integrins $\phi$ angle on cell membrane distribution                                 | $I_\phi$                                                                          | $U[0, 2\pi]$                   | 1/rad           |

5    **Supplementary table 2: Parameters' name, symbols and values.**

6

| Parameter                                                                               | Symbol                                        | List of values            | Unit of measure |
|-----------------------------------------------------------------------------------------|-----------------------------------------------|---------------------------|-----------------|
| Mechanical max. magnitude                                                               | $M$                                           | {1000, 10000}             | $\mu Pa$        |
| Mechanical period                                                                       | $P$                                           | {10000, 50000, 2000000}   | s               |
| MEK <sub>act</sub> dissociation time from RAF <sub>act</sub> + MEK <sub>d</sub> comp.   | $T_{RAF_{act}+MEK_d \rightarrow MEK_{act}}$   | {10, 90, 300, 480, 1320}  | s               |
| MEK <sub>act</sub> dissociation time from MEK <sub>act</sub> + ERK <sub>d</sub> comp.   | $T_{MEK_{act}+ERK_d \rightarrow MEK_{act}}$   | {8, 90, 300, 480, 1320}   | s               |
| MEK <sub>d</sub> relaxation time                                                        | $T_{MEK_{act} \rightarrow MEK_d}$             | {60, 90, 300, 480, 1320}  | s               |
| ERK <sub>act</sub> activation time                                                      | $T_{MEK_{act}+ERK_d \rightarrow ERK_{act}}$   | {8, 90, 300, 480, 1320}   | s               |
| ERK <sub>d</sub> relaxation time                                                        | $T_{ERK_{act} \rightarrow ERK_d}$             | {90, 300, 480, 600, 1320} | s               |
| ERK <sub>act</sub> dissociation time from ERK <sub>act</sub> + RUNX2 <sub>d</sub> comp. | $T_{ERK_{act}+RUNX2_d \rightarrow ERK_{act}}$ | {10, 90, 300, 480, 1320}  | s               |

7

## 8 Supplementary table 3: Parameter ranges

9 Names, symbols, unit of measures and list of values simulated. Bold quantities represent the

10 baseline values. Where no baseline is present, then all possible combinations has been considered.

11 Each set of parameters has been independently repeated 10 times.
